# Supplementary material for: Naphthalenediimide-based nanoarchitectonics for a fluorescent chemosensor with highly selective and sensitive detection of cyanide ions
Source: Royal Society of Chemistry journal article supplement (doi:10.1039/d3ay00615h), 2023-01-01
Supplement: d3ay00615h1.pdf [file d3ay00615h1.pdf]

## Electronic Supporting Information

### Experimental procedures:

#### Synthesis of 2,6-Dibromo-1,4,5,8-naphthalenetetracarboxylic Dianhydride (4):

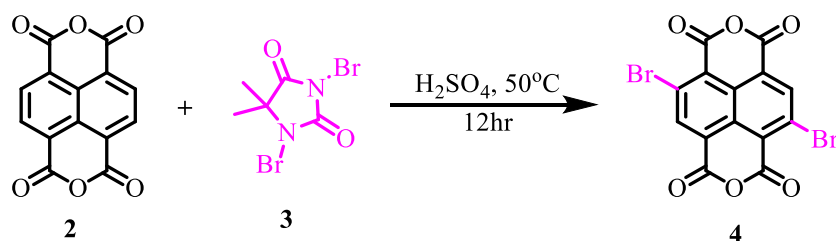

Synthesized using reported literature procedure<sup>1</sup>

In single-necked RB flask, NDA (2) (2.68 g, 10 mmol) was stirred in concentrated sulfuric acid (25 mL) at ambient temperature, the mixture was stirred at room temperature for 5 min to obtain a solution. DBH (3) (4.28 g, 15 mmol) was added in 8 portions over a period of 2h at room temperature (without escaping bromine from solution). The resulting brown solution was stirred at 50°C for 12 h. The mixture was poured into crushed ice to precipitate solid. The precipitated solid was filtered, washed with water then with methanol, and finally dried under vacuum to obtain crude product. (3.49 g, 82%); <sup>1</sup>H NMR (400 MHz, [D<sub>6</sub>]DMSO): 8.78 (s, 2H); <sup>13</sup>C NMR (100 MHz, [D<sub>6</sub>]DMSO): 157.9, 156.4, 137.5, 129.4, 127.4, 124.2, 123.4

#### Synthesis of 4,9-dibromo-2,7-dioctylbenzo[*lmn*][3,8]phenanthroline-1,3,6,8(2H,7H)-tetraone (5)

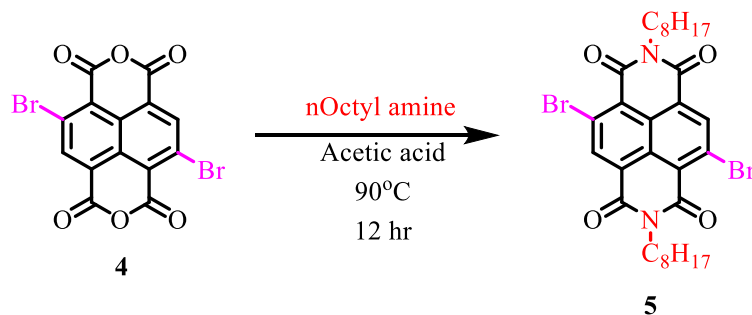

Synthesized using reported literature procedure<sup>1</sup>

Dibromo-NDA (4) (1.06 g, 2.5 mmol), n-octylamine (1.24 mL, 7.5 mmol), and acetic acid (80 mL) was stirred under nitrogen atmosphere at 90°C for 12 h. The mixture was cooled to room

temperature. The precipitate was separated by filtration, washed with methanol and dried under vacuum to obtain 4,9-dibromo-2,7-dioctylbenzo[*lmn*][3,8]phenanthroline-1,3,6,8(2H,7H)-tetraone (**5**) as a yellow crystalline solid (1.21g, 75%);  $^1\text{H}$  NMR (400 MHz,  $\text{CDCl}_3$ ): 8.99 (s, 1H, Ar-H), 4.20-4.16 (t, 4H), 1.77-1.69 (quin, 4H), 1.42-1.27 (m, 20H), 0.89-0.86 (t, 6H);  $^{13}\text{C}$  NMR (400 MHz,  $\text{CDCl}_3$ )  $\delta$  160.9, 160.8, 139.2, 128.4, 127.8, 125.5, 124.2, 41.7, 31.9, 29.4, 29.3, 28.0, 27.2, 22.7, 14.2

**Synthesis of 4-bromo-2,7-dioctyl-9-(octylamino)benzo[*lmn*][3,8]phenanthroline-1,3,6,8(2H,7H)-tetraone (6)**

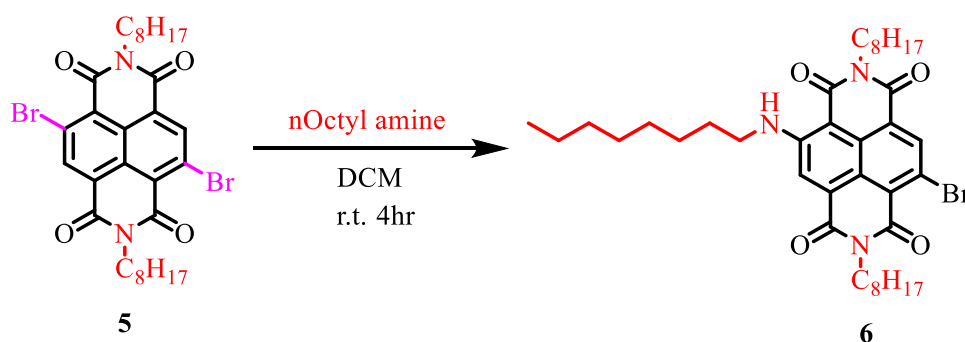

In a 100 mL dried oven RB flask take dibromo NDI (**5**) (0.5g, 0.00077 mol) and add 30 mL of dry DCM to it, stir the reaction mixture for 5 min then add n-octyl amine (0.119g/0.153 ml, 0.00092) to it stirred the reaction mixture for 4 h under nitrogen atmosphere. The resulting reaction mixture was extracted with DCM and followed by washing of 6N HCl repeatedly, then with saturated NaCl, organic layer was collected and dried over sodium sulphate then evaporated on rota evaporator. The crude product was purified by silica gel column chromatography. The yield of isolated product (70% yield);  $^1\text{H}$  NMR (400 MHz,  $\text{CDCl}_3$ ) 10.05 (s, 1H), 8.79 (s, 1H), 8.21 (s, 1H), 4.14 (t, 4H), 3.55 (t, 2H), 1.83 (t, 2H), 1.71-1.28(m, 34H), 0.88 (m, 9H);  $^{13}\text{C}$  NMR (400 MHz,  $\text{CDCl}_3$ )  $\delta$  165.8, 161.9, 161.7, 161.3, 151.7, 138.2, 128.6, 127.2, 123.3, 123.2, 121.3, 120.4, 120.1, 99.8, 43.3, 41.4, 40.5, 31.8, 29.7, 29.3, 29.2, 29.1, 28.0, 27.9, 27.1, 27.0, 22.6, 14.0

**Synthesis of 4-(2,7-dioctyl-9-(octylamino)-1,3,6,8-tetraoxo-1,2,3,6,7,8-hexahydrobenzo[*lmn*][3,8]phenanthroline-4-yl)benzaldehyde (8)**

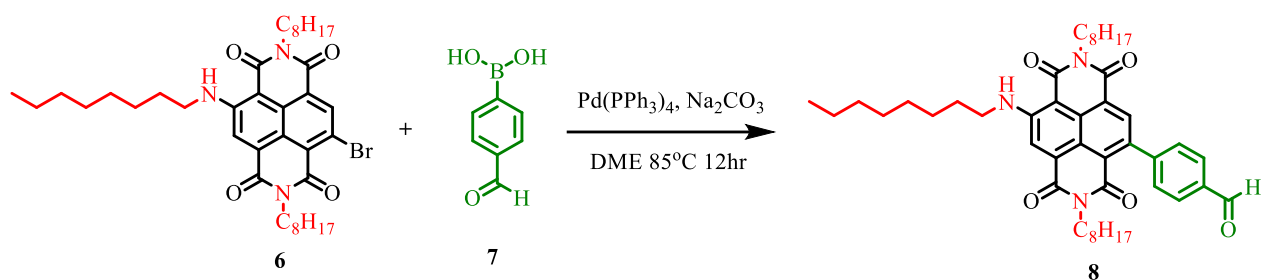

Charge 100 mL reaction RB flask with compound NDI (**6**) (0.5 g, 0.00072 mol) and add 30 mL dimethoxyethane (DME) degassed it for 3 times and then 2M sodium carbonate 10 mL added to it, degassed it for several times then (4-formylphenyl)boronic acid (**7**)(0.13g, 0.009 mole) was added again degassed it for 2 times, catalyst Pd(PPh<sub>3</sub>)<sub>4</sub> (10 mole%) were added at rt under nitrogen atmosphere. After 24h refluxing solvent evaporated on rota evaporator the residue remained in flask extracted in DCM (100 mL × 3 times). Then crude product washed with saturated NaCl. The organic layer was dried on sodium sulphate and crude product was purified using silica gel column chromatography. The yield of isolated product (63.83% yield) ; <sup>1</sup>H NMR (400 MHz, CDCl<sub>3</sub>) 10.15 (s, 1H), 10.11 (s,1H), 8.45 (s, 1H), 8.31 (s, 1H), 8.10 (d, 2H), 7.51 (d, 2H), 4.18 (t, 2H), 4.02 (t, 2H), 3.61 (q, 2H), 1.86 (q, 2H), 1.75 (m, 2H), 1.61-1.20 (m, 35H), 0.9 (m, 10H); <sup>13</sup>C NMR (400 MHz, CDCl<sub>3</sub>) δ 191.9, 166.2, 162.7, 162.6, 152.1, 147.7, 139.7, 135.4, 134.4, 129.6, 129.3, 129.1, 128.2, 122.9, 122.6, 120.6, 120.2, 99.7, 43.3, 41.0, 40.4, 31.8, 31.7, 29.4, 29.3, 29.2, 29.1, 28.0, 27.1, 27.0, 22.6, 12.0

**Synthesis of (Z)-3-(4-(2,7-dioctyl-9-(octylamino)-1,3,6,8-tetraoxo-1,2,3,6,7,8-hexahydrobenzo[lmn][3,8]phenanthrolin-4-yl)phenyl)-2-(4-nitrophenyl)acrylonitrile (**1**).**

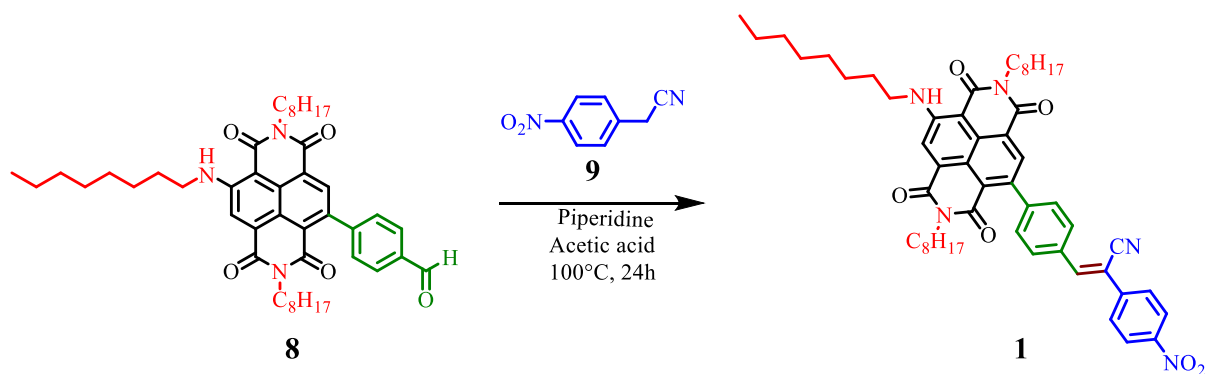

In an oven dried 50 mL RB, the reaction mixture of 2-(4-nitrophenyl)acetonitrile (**9**) (0.022 gm, 0.00014 mole) in 10 mL acetic acid was stirred followed by the addition of 1.5 mL of piperidine in a nitrogen atmosphere. The colour of the mixture changed immediately to a transparent pink. The mixture was stirred further for 30 min. then compound NDI aldehyde (**8**)

(0.1 gm, 0.00014 mole) was added and the reaction mixture was heated to 100°C. The completion reaction was monitored using TLC. After completion of reaction (24 h), the mixture was cooled to room temperature and poured into ice water. The prepared compound was extracted using DCM (100 mL×3 times). Then the crude product was washed with sodium bicarbonate followed by saturated NaCl. The obtained organic layer was dried on sodium sulfate and the crude product was purified using silica gel column chromatography. The yield of isolated product (29.16% yield) ; <sup>1</sup>H NMR (400 MHz, CDCl<sub>3</sub>) 10.16 (s, 1H), 8.50 (s, 1H), 8.35 (d, 3H), 8.08 (d, 2H), 7.85 (d, 2H), 7.74 (s, 1H), 7.50 (d, 2H), 4.20 (t, 2H), 4.04 (t, 2H), 3.61 (q, 2H), 1.84 (q, 2H) 1.73-0.84(m, 43H); <sup>13</sup>C NMR (400 MHz, CDCl<sub>3</sub>) δ 162.7, 152.1, 147.9, 145.1, 134.7, 129.7, 129.3, 126.8, 124.4, 122.7, 120.6, 117.3, 43.4, 41.1, 31.8, 31.7, 29.7, 29.5, 29.4, 29.3, 29.2, 29.1, 28.0, 27.2, 27.1, 27.08, 27.02, 22.6, 14.1

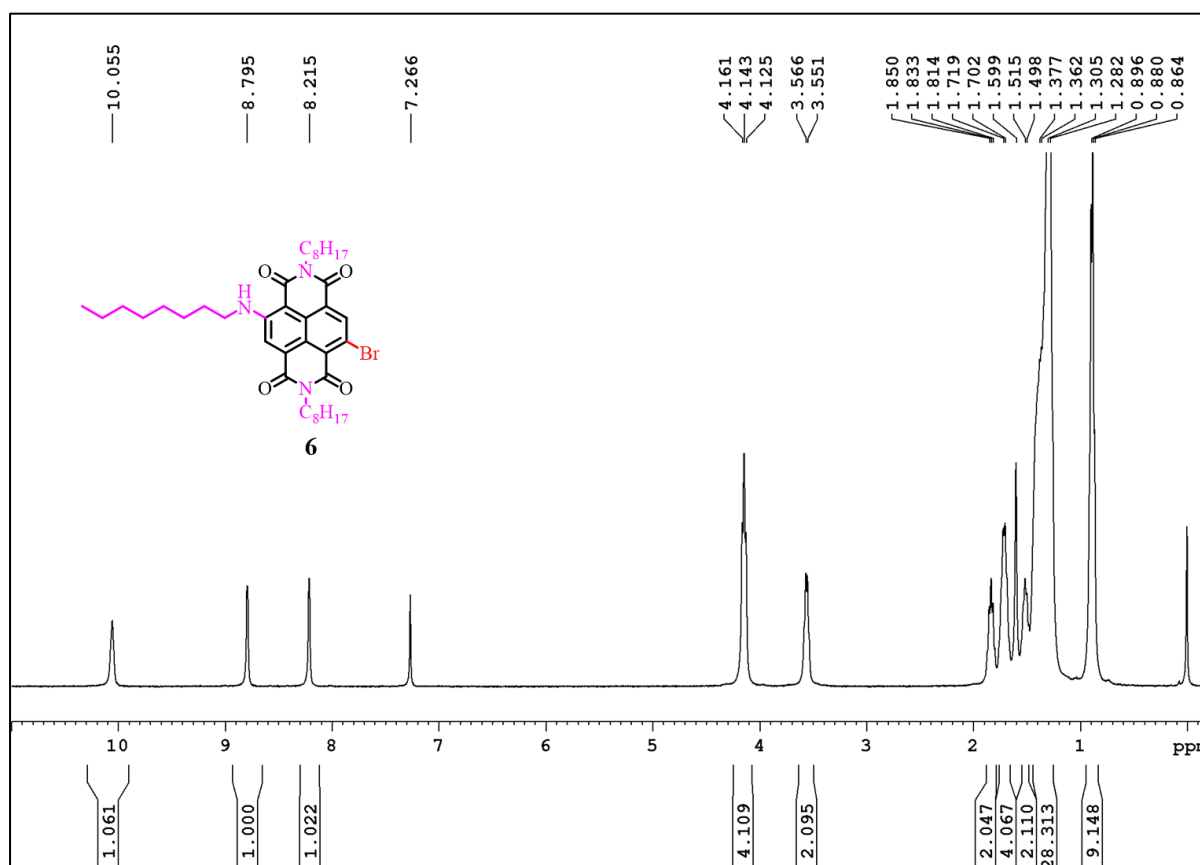

**Figure S1.** <sup>1</sup>H NMR spectra of Compound 6

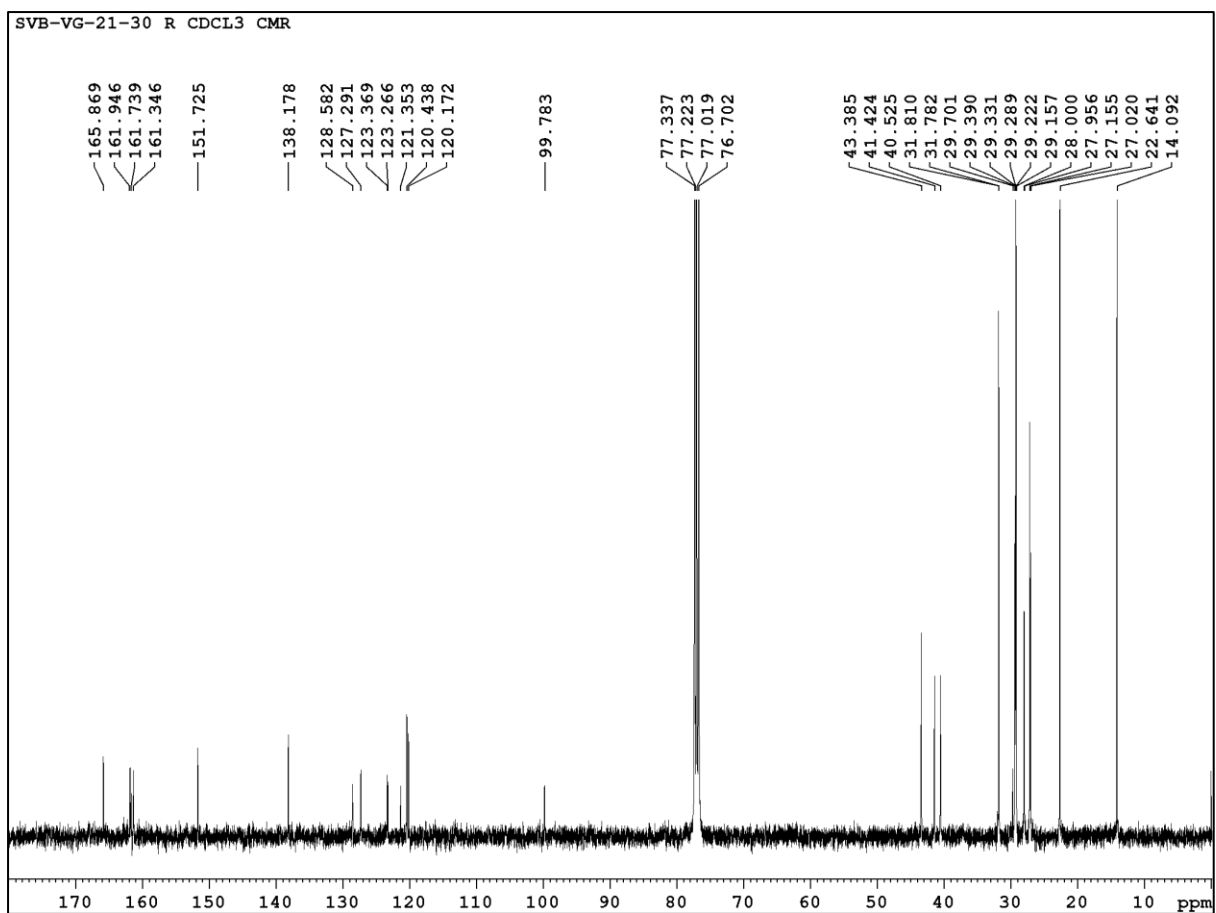

Figure S2. <sup>13</sup>C NMR spectra of Compound 6

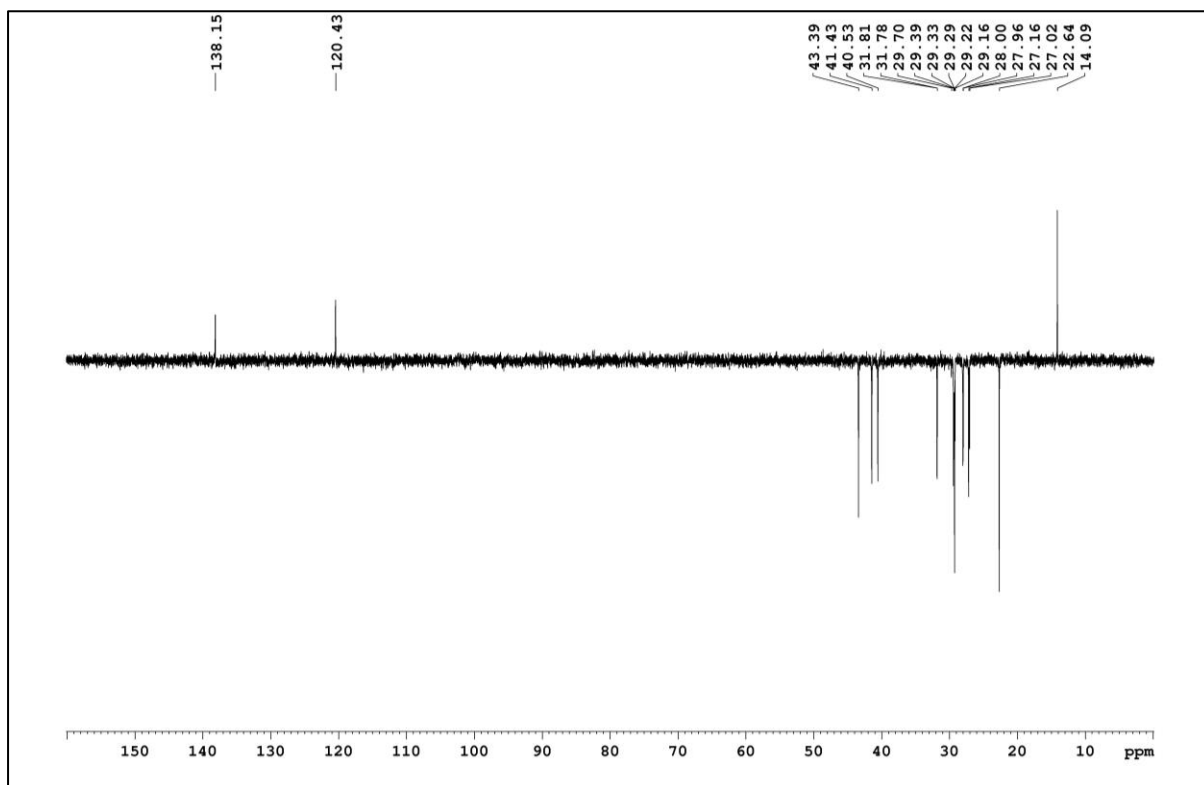

Figure S3. DEPT spectra of Compound 6

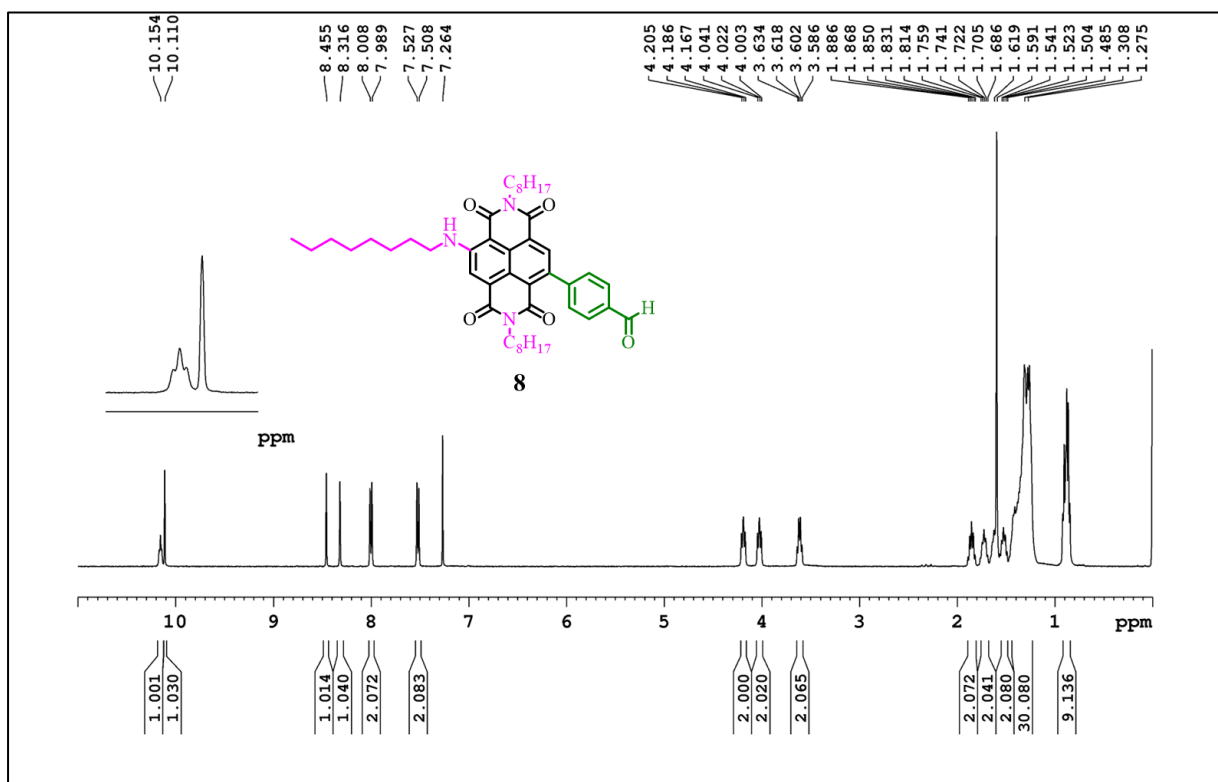

Figure S4. <sup>1</sup>H NMR spectra of Compound 8

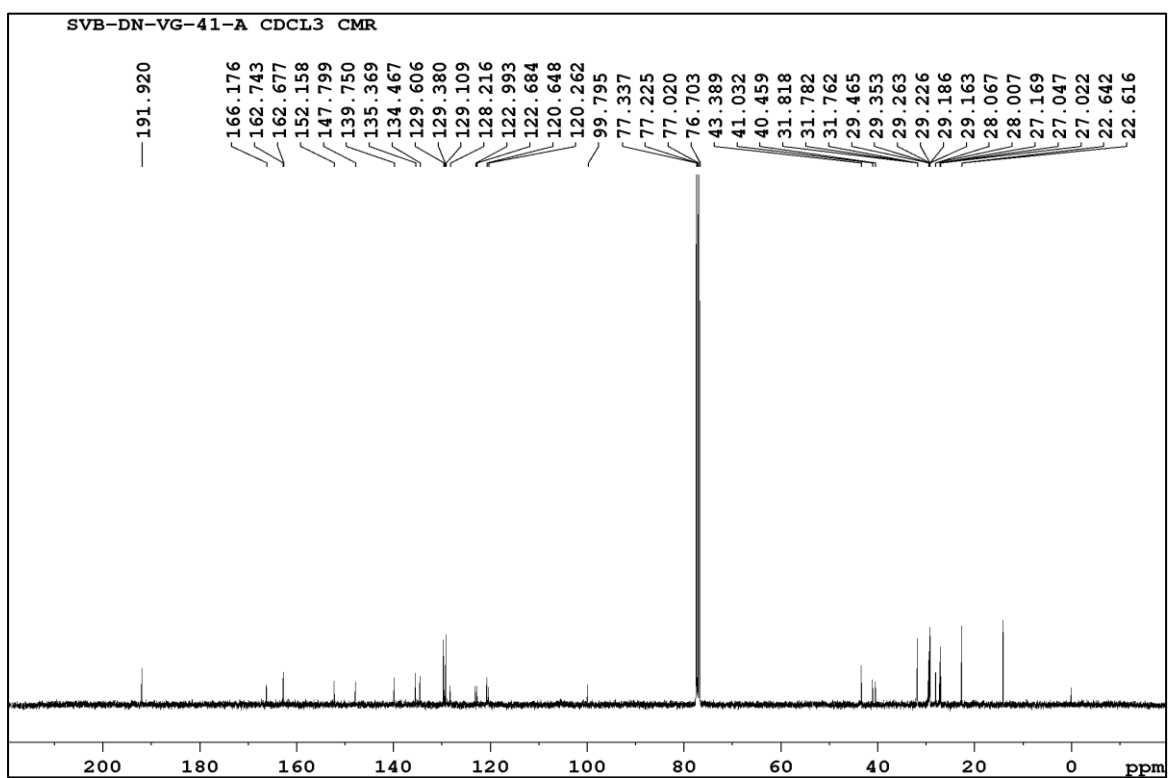

Figure S5. <sup>13</sup>C NMR spectra of Compound 8

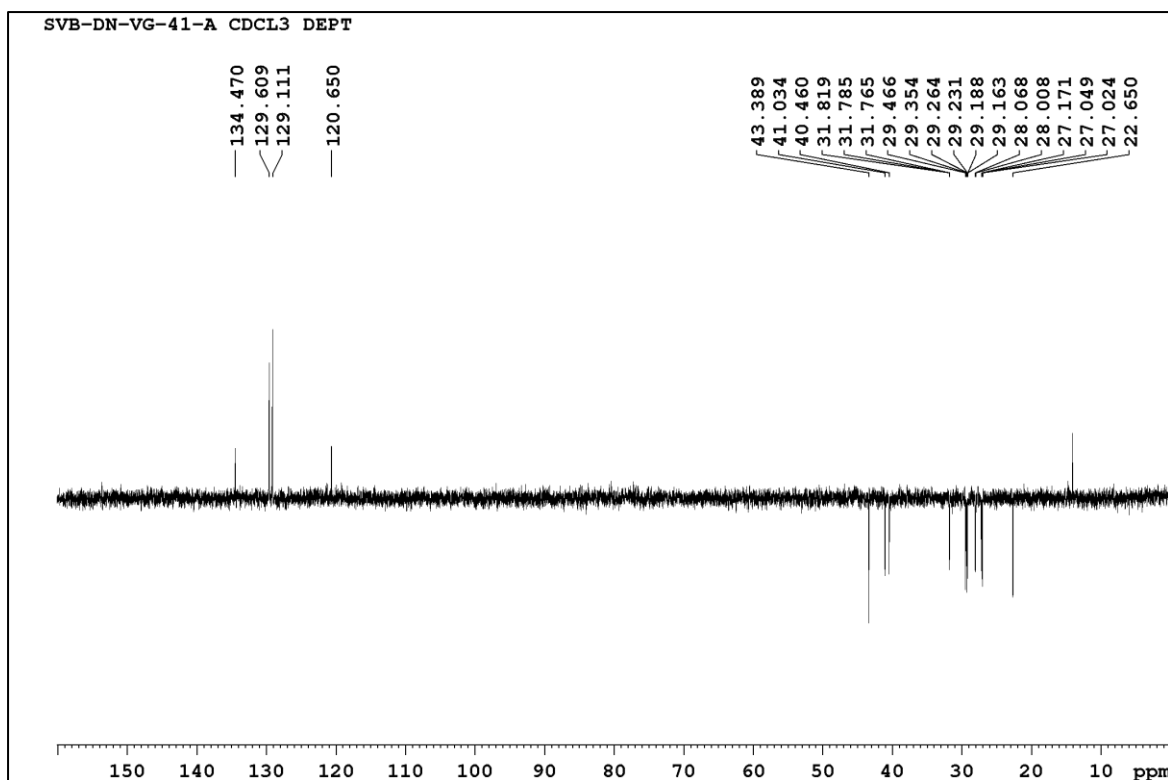

Figure S6. DEPT NMR spectra of Compound 8

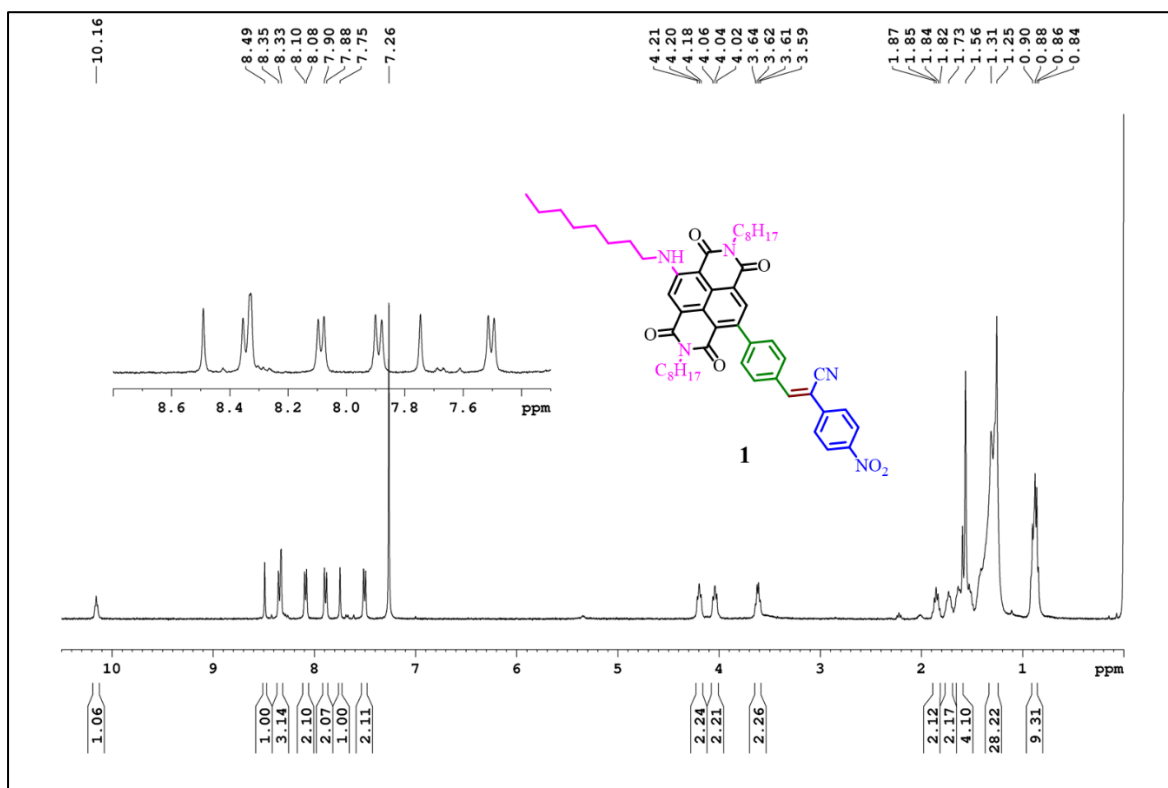

Figure S7. <sup>1</sup>H NMR spectra of Compound 1

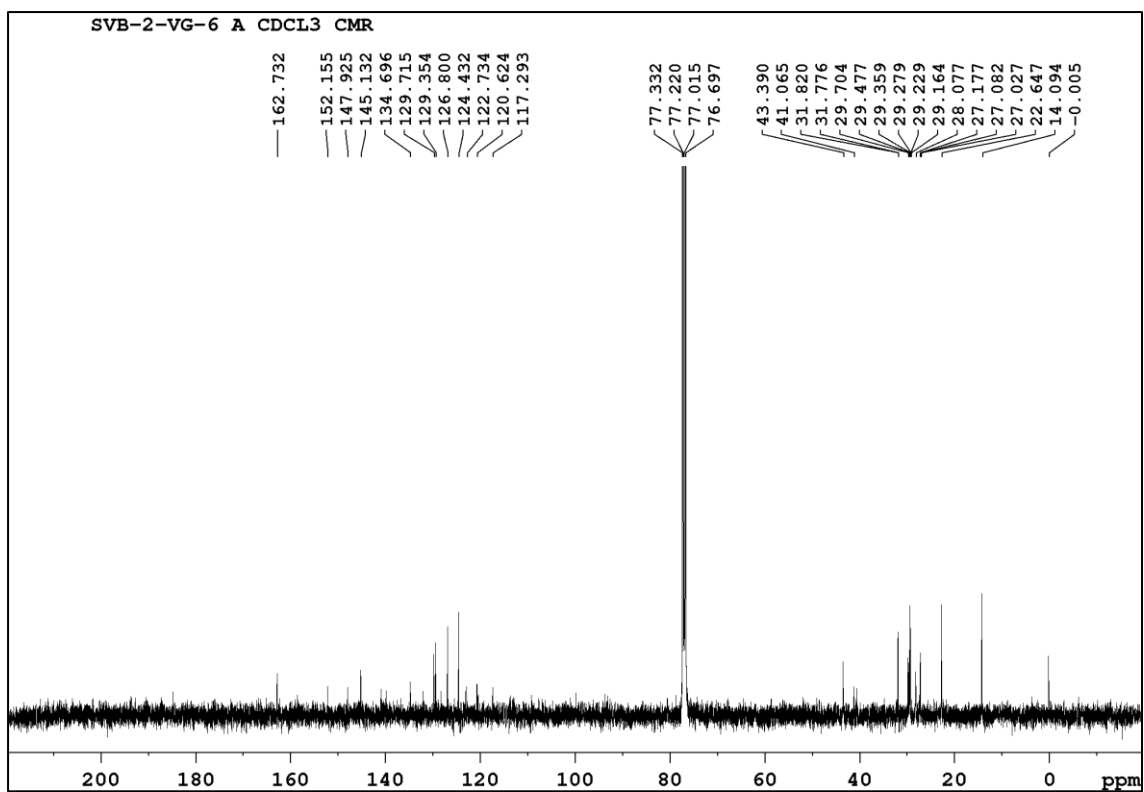

Figure S8.  $^{13}\text{C}$  NMR spectra of Compound **1**

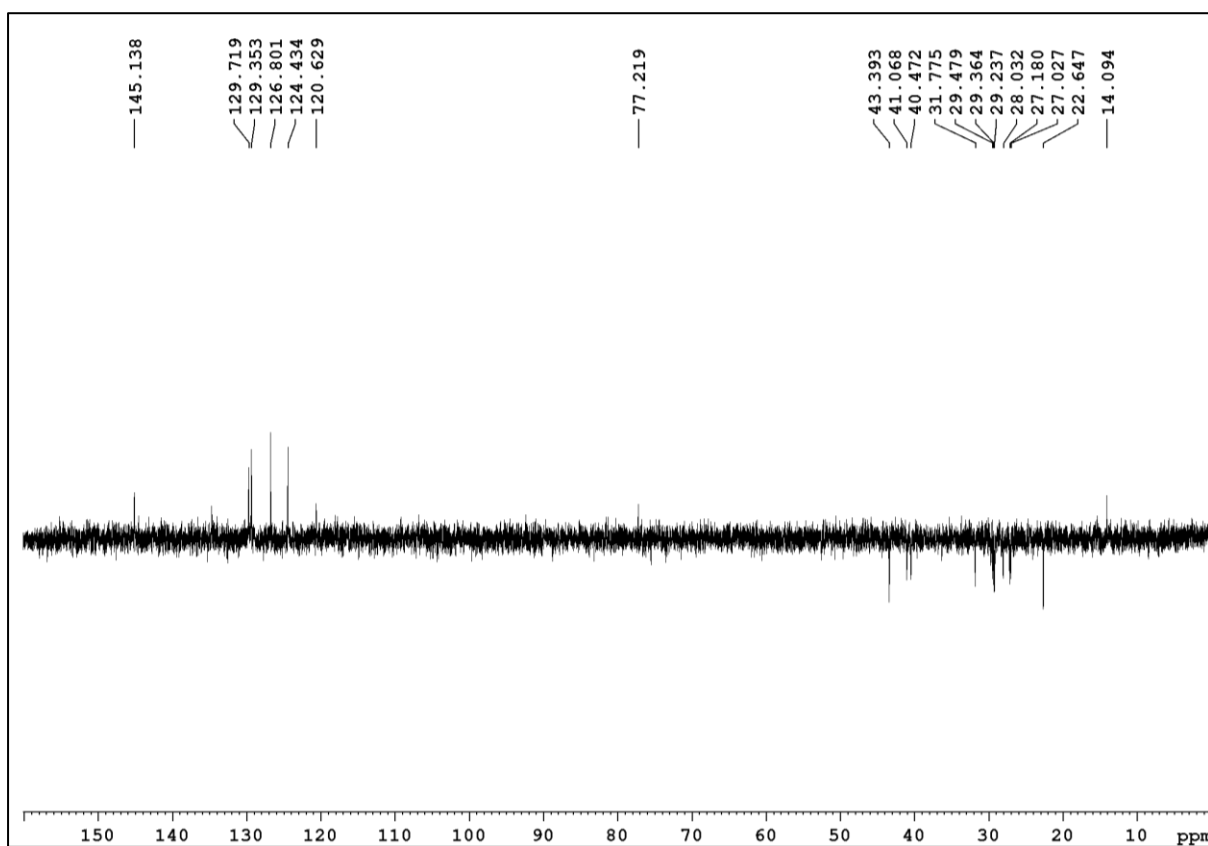

Figure S9. DEPT spectra of Compound **1**



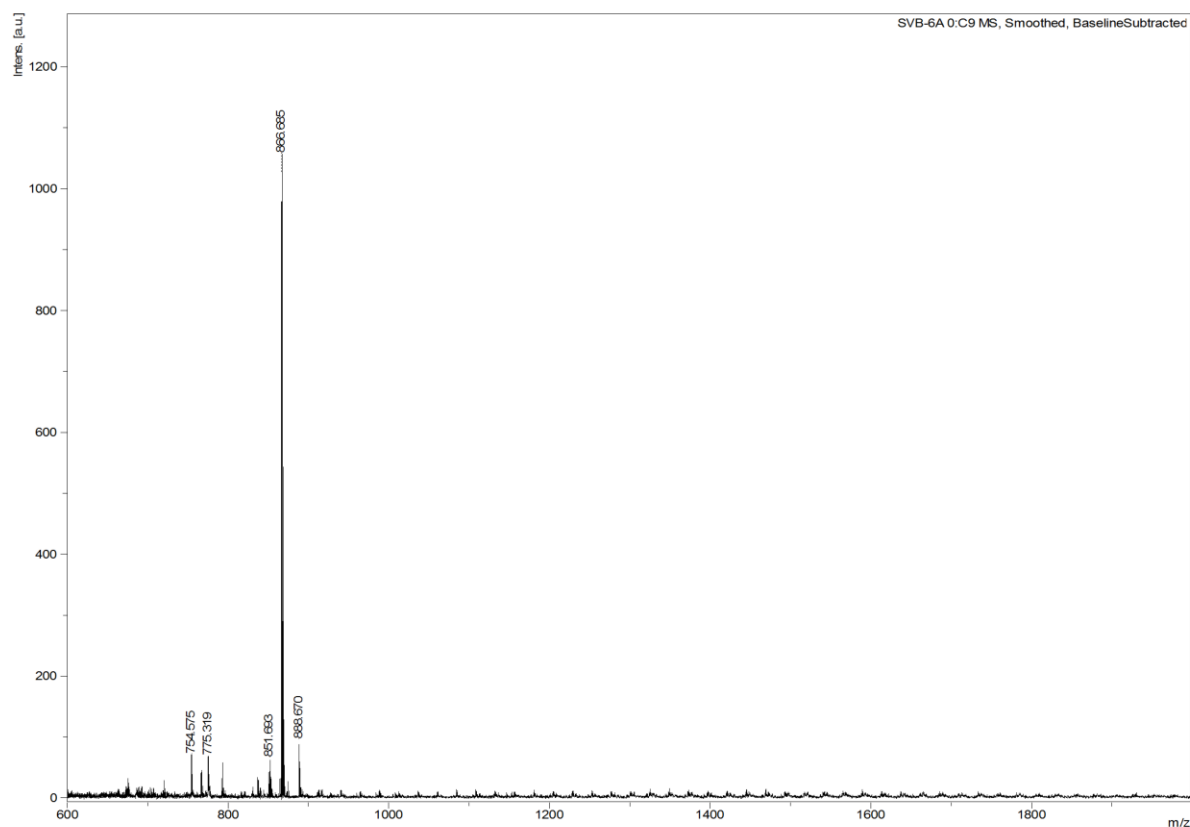

**Figure S10.** HRMS of Compound 1

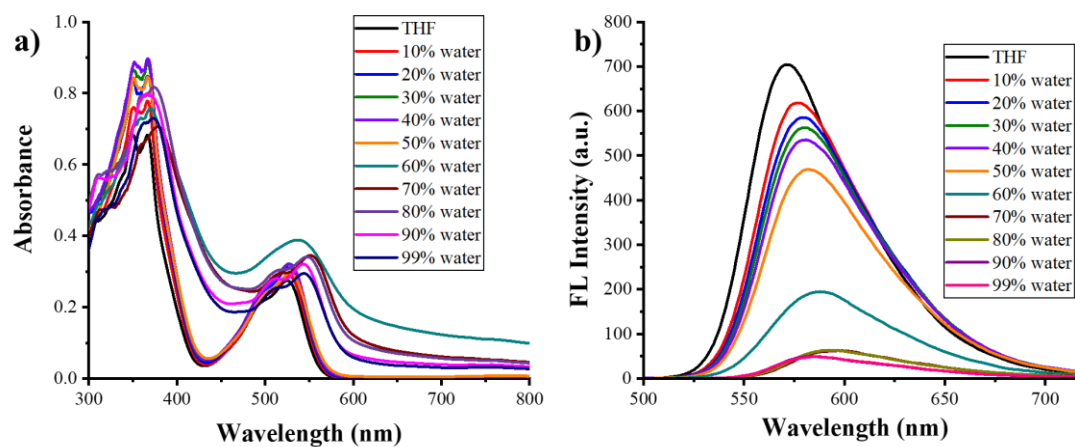

**Figure S11.** (a) UV-vis absorption spectra in THF/H<sub>2</sub>O  $f_w$  (0 to 99%). (b) Fluorescence emission spectra of the NDI 1 in THF/H<sub>2</sub>O (v/v) mixtures with different water fractions at  $\lambda_{ex}$  = 369 nm

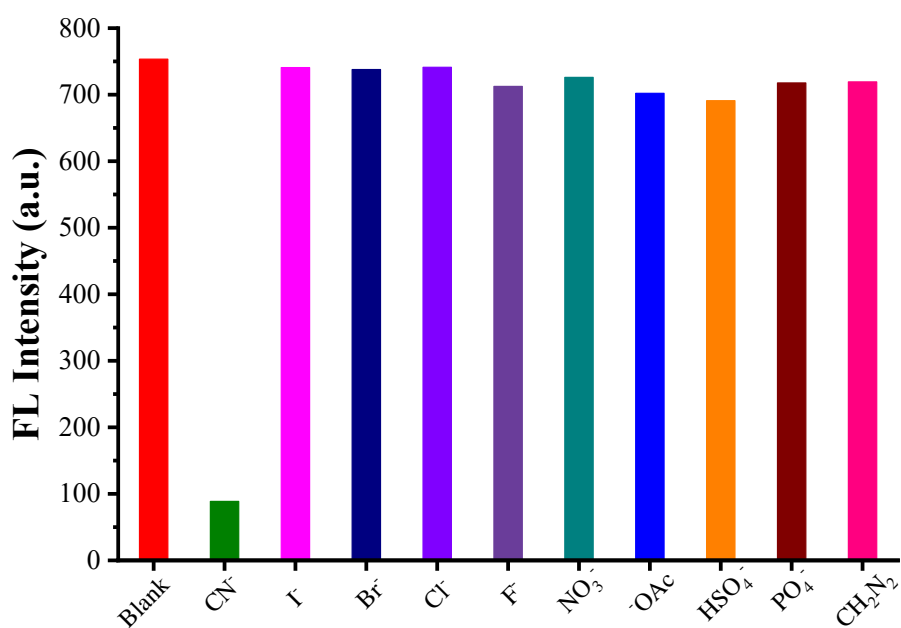

**Figure S12.** (a) Fluorescence responses of probe **1** toward 2 equiv. of CN<sup>-</sup>, I<sup>-</sup>, Br<sup>-</sup>, Cl<sup>-</sup>, F<sup>-</sup>, NO<sub>3</sub><sup>-</sup>, ⁻OAc, HSO<sub>4</sub><sup>-</sup>, H<sub>2</sub>PO<sub>4</sub><sup>-</sup>, and ClO<sub>4</sub><sup>-</sup> at 575 nm wavelength in chloroform,

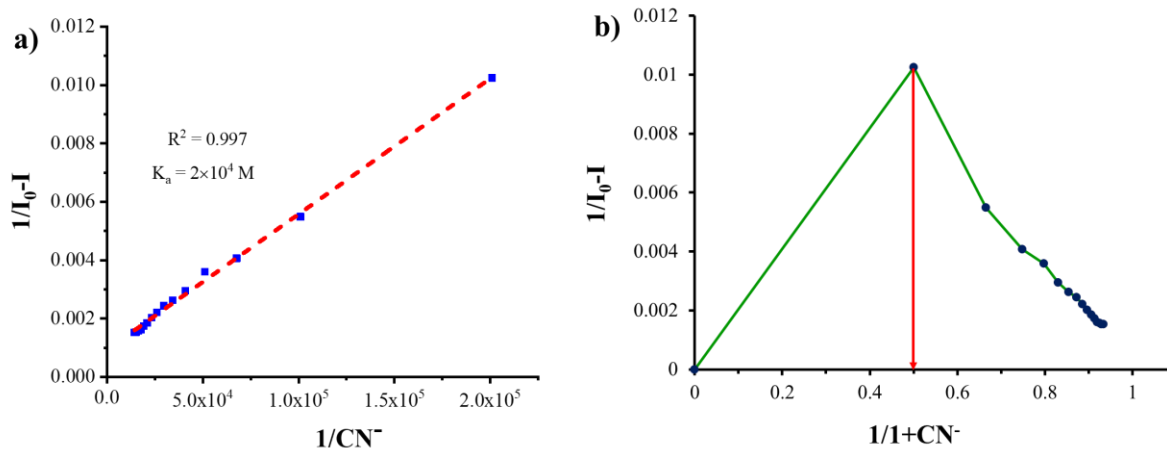

**Figure S13.** a) B-H plot b) Jobs plot

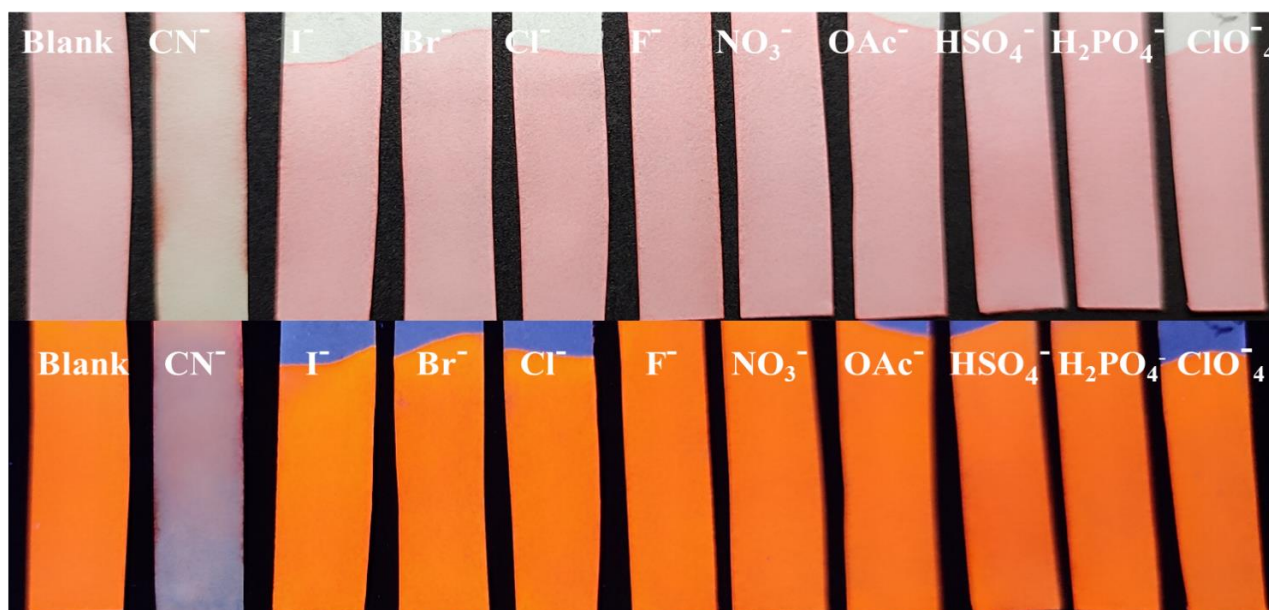

**Figure S14.** Paper strip based selectively detection of  $\text{CN}^-$  ion with the probe NDI **1**, over other anions used by naked eyes a) under visible light and b) under 365 nm UV light.

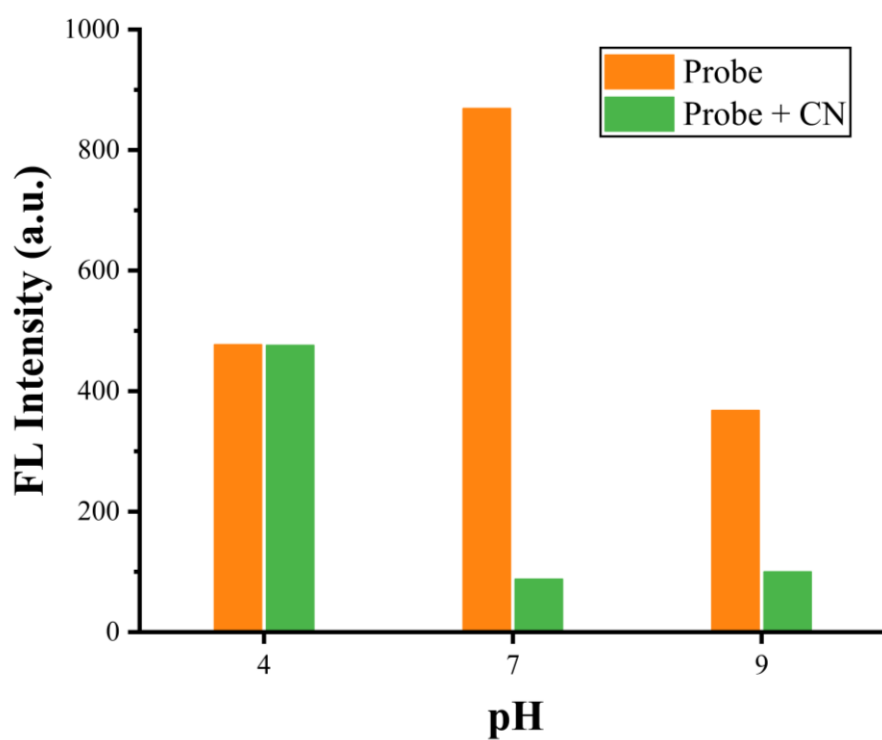

**Figure S15.** pH dependence study of probe **1** with CN

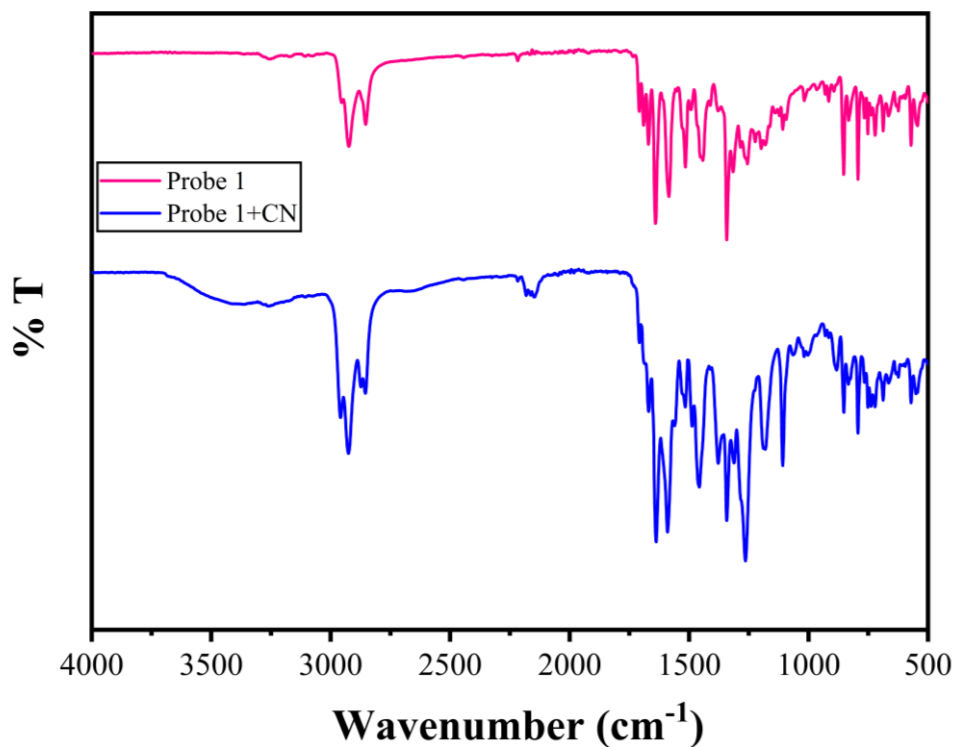

**Figure S16.** IR spectra of probe 1 with and without CN

**Table S1.** Fluorescence life time of **probe 1** and **probe 1+CN** in chloroform

| Sample Code | Solvent           | $\tau_1$ (ns) | Contribution (%) |
|-------------|-------------------|---------------|------------------|
| NDI-1       | CHCl <sub>3</sub> | 7.58          | 100%             |
| NDI-1 + CN  | CHCl <sub>3</sub> | 7.88          | -                |

**Table S2:** HOMO & LUMO of probe 1 and 1+CN<sup>-</sup>

| 1 | Orbital number | Orbital energy (eV) | Orbital picture |
|---|----------------|---------------------|-----------------|
|   |                |                     |                 |

|                   |     |       |                                                                                      |
|-------------------|-----|-------|--------------------------------------------------------------------------------------|
| HOMO              | 232 | -6.20 | 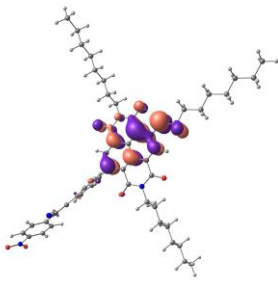   |
| LUMO              | 233 | -3.45 |   |
| 1+CN <sup>-</sup> |     |       |                                                                                      |
| HOMO              | 239 | -4.45 |  |
| LUMO              | 240 | -3.12 |  |

**Table S3.** Comparison of CN<sup>-</sup> sensing with literature

| Compound                                                                            | Sensing method        | LOD (μM) | Test strip | Ref.           |
|-------------------------------------------------------------------------------------|-----------------------|----------|------------|----------------|
| 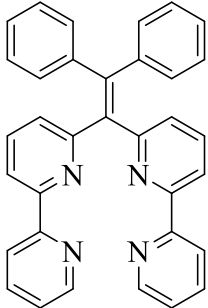   | Fluorescence turn-on  | 0.59     | No         | S <sup>2</sup> |
|   | Fluorescence turn-on  | 1.09     | No         | S <sup>3</sup> |
|  | Colorimetric Probe    | 1.5      | No         | S <sup>4</sup> |
|  | Fluorescence turn-Off | 0.67     | Yes        | S <sup>5</sup> |
|  | Colorimetric Probe    | 1.1      | Yes        | S <sup>6</sup> |

|                                                                                                                           |                                       |     |     |                 |
|---------------------------------------------------------------------------------------------------------------------------|---------------------------------------|-----|-----|-----------------|
| 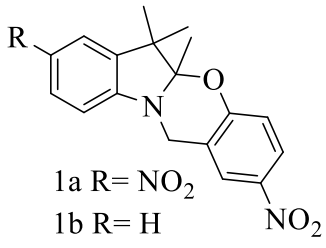 <p>1a R= NO<sub>2</sub><br/>1b R= H</p> | Chemosensor                           | 1   | No  | S <sup>7</sup>  |
|                                         | Fluorescence turn-on and colorimetric | 66  | No  | S <sup>8</sup>  |
|                                        | Fluorescence turn-on                  | 1.4 | No  | S <sup>9</sup>  |
|                                        | Fluorescence turn-off                 | 2.4 | yes | S <sup>10</sup> |
|                                        | Colorimetric                          | 3   | yes | S <sup>11</sup> |

|                                                                                     |                          |      |     |                 |
|-------------------------------------------------------------------------------------|--------------------------|------|-----|-----------------|
| 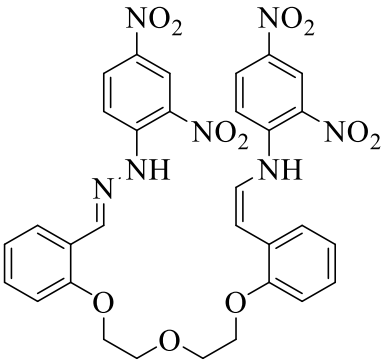   | Colorimetric             | 1    | yes | S <sup>11</sup> |
|    | Fluorescence turn-on     | 6    | No  | S <sup>12</sup> |
|   | Fluorescence turn-off    | 0.75 | yes | S <sup>13</sup> |
|  | Colorimetric chemosensor | 9.8  | yes | S <sup>14</sup> |
|  | Fluorescence turn-on     | 14   | yes | S <sup>15</sup> |
|  | -                        | 5    | No  | S <sup>16</sup> |



|                                                                                     |                          |       |     |                 |
|-------------------------------------------------------------------------------------|--------------------------|-------|-----|-----------------|
| 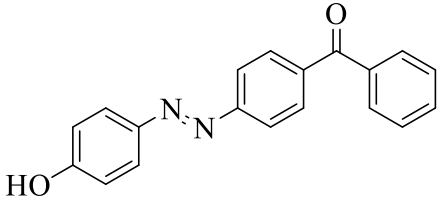   | Colorimetric chemosensor | 20    | No  | S <sup>17</sup> |
|    | Photochromic sensor      | 5.26  | No  | S <sup>18</sup> |
|   | Colorimetric sensor      | 0.744 | No  | S <sup>19</sup> |
|  | Colorimetric chemosensor | 19.4  | No  | S <sup>20</sup> |
|  | Colorimetric sensor      | 1.27  | Yes | S <sup>21</sup> |
|  | Colorimetric sensor      | 8.0   | Yes | S <sup>22</sup> |

|                                                                                     |                      |      |     |                 |
|-------------------------------------------------------------------------------------|----------------------|------|-----|-----------------|
| 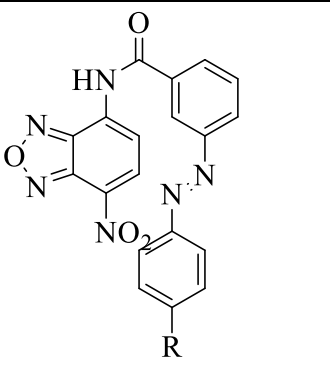   | Fluorescence sensor  | 1.5  | No  | S <sup>23</sup> |
|    | Fluorescence turn-on | 0.46 | Yes | S <sup>24</sup> |
|   | Fluorescence sensor  | 20.0 | Yes | S <sup>25</sup> |
|  | Fluorescence sensor  | 6    | No  | S <sup>26</sup> |
|  | Fluorescence turn-on | 5    | Yes | S <sup>27</sup> |

|                                                                                     |                                              |      |     |                 |
|-------------------------------------------------------------------------------------|----------------------------------------------|------|-----|-----------------|
| 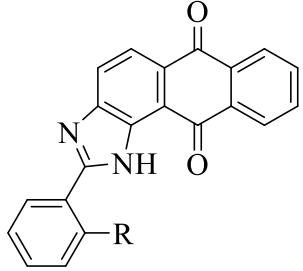   | Fluorescence turn-on                         | 0.6  | No  | S <sup>28</sup> |
|    | Colorimetric and Fluorescence                | 1.30 | No  | S <sup>29</sup> |
|   | Fluorescence sensor                          | 1.5  | No  | S <sup>30</sup> |
|  | Naked eye, Colorimetric, Fluorescence sensor | 0.41 | Yes | This Work       |

## References:

- 1 M. Sasikumar, Y. V. Suseela and T. Govindaraju, *Asian J. Org. Chem.*, 2013, **2**, 779–785.
- 2 M. T. Gabr and F. C. Pigge, *Dalt. Trans.*, 2018, **47**, 2079–2085.
- 3 A. Sebastian and E. Prasad, *Langmuir*, 2020, **36**, 10537–10547.
- 4 X. Cheng, R. Tang, H. Jia, J. Feng, J. Qin and Z. Li, *ACS Appl. Mater. Interfaces*, 2012, **4**, 4387–4392.

- 5 G. A. Zalmi, D. N. Nadimetla, P. Kotharkar, A. L. Puyad, M. Kowshik and S. V. Bhosale, *ACS Omega*, 2021, **6**, 16704–16713.
- 6 S. D. Padghan, C. Y. Wang, W. C. Liu, S. S. Sun, K. M. Liu and K. Y. Chen, *Dye. Pigment.*, 2020, **183**, 108724.
- 7 J. Ren, W. Zhu and H. Tian, *Talanta*, 2008, **75**, 760–764.
- 8 Y. D. Lin, Y. S. Peng, W. Su, C. H. Tu, C. H. Sun and T. J. Chow, *Tetrahedron*, 2012, **68**, 2523–2526.
- 9 L. Yang, X. Li, Y. Qu, W. Qu, X. Zhang, Y. Hang, H. Ågren and J. Hua, *Sensors Actuators, B Chem.*, 2014, **203**, 833–847.
- 10 W. C. Lin, S. K. Fang, J. W. Hu, H. Y. Tsai and K. Y. Chen, *Anal. Chem.*, 2014, **86**, 4648–4652.
- 11 V. K. Gupta, A. K. Singh and N. Gupta, *Sensors Actuators, B Chem.*, 2014, **204**, 125–135.
- 12 P. B. Pati and S. S. Zade, *RSC Adv.*, 2013, **3**, 13457–13462.
- 13 L. Wang, L. Zhu and D. Cao, *New J. Chem.*, 2015, **39**, 7211–7218.
- 14 M. J. Peng, Y. Guo, X. F. Yang, L. Y. Wang and J. An, *Dye. Pigment.*, 2013, **98**, 327–332.
- 15 P. Zhang, B. B. Shi, T. B. Wei, Y. M. Zhang, Q. Lin, H. Yao and X. M. You, *Dye. Pigment.*, 2013, **99**, 857–862.
- 16 H. T. Niu, X. Jiang, J. He and J. P. Cheng, *Tetrahedron Lett.*, 2008, **49**, 6521–6524.
- 17 J. Isaad and A. Perwuelz, *Tetrahedron Lett.*, 2010, **51**, 5810–5814.
- 18 I. S. Park, E. J. Heo and J. M. Kim, *Tetrahedron Lett.*, 2011, **52**, 2454–2457.
- 19 O. A. Adegoke, T. E. Adesuji and O. E. Thomas, *Spectrochim. Acta - Part A Mol. Biomol. Spectrosc.*, 2014, **128**, 147–152.
- 20 S. M. Kim, M. Kang, I. Choi, J. J. Lee and C. Kim, *New J. Chem.*, 2016, **40**, 7768–7778.
- 21 Y. S. Lin, J. X. Zheng, Y. K. Tsui and Y. P. Yen, *Spectrochim. Acta - Part A Mol. Biomol. Spectrosc.*, 2011, **79**, 1552–1558.
- 22 X. X. Ou, Y. L. Jin, X. Q. Chen, C. Bin Gong, X. B. Ma, Y. S. Wang, C. F. Chow and Q. Tang, *Anal. Methods*, 2015, **7**, 5239–5244.
- 23 Y. K. Tsui, S. Devaraj and Y. P. Yen, *Sensors Actuators, B Chem.*, 2012, **161**, 510–519.
- 24 N. Assadollahnejad, M. Kargar, H. R. Darabi, N. Abouali, S. Jamshidi, A. Sharifi, K. Aghapoor and H. Sayahi, *New J. Chem.*, 2019, **43**, 13001–13009.
- 25 W. J. Qu, W. T. Li, H. L. Zhang, T. B. Wei, Q. Lin, H. Yao and Y. M. Zhang, *Sensors Actuators, B Chem.*, 2017, **241**, 430–437.
- 26 Y. Qu, B. Jin, Y. Liu, Y. Wu, L. Yang, J. Wu and J. Hua, *Tetrahedron Lett.*, 2013, **54**, 4942–4944.

- 27 K. Deng, L. Wang, Q. Xia, R. Liu and J. Qu, *Sensors Actuators, B Chem.*, 2019, **296**, 126645.
- 28 G. Balamurugan, P. Venkatesan, S. P. Wu and S. Velmathi, *RSC Adv.*, 2016, **6**, 24229–24235.
- 29 A. K. Mahapatra, S. K. Manna, B. Pramanik, K. Maiti, S. Mondal, S. S. Ali and D. Mandal, *RSC Adv.*, 2015, **5**, 10716–10722.
- 30 S. Kim, J. Y. Noh, S. J. Park, Y. J. Na, I. H. Hwang, J. Min, C. Kim and J. Kim, *RSC Adv.*, 2014, **4**, 18094–18099.
